# 1 **A Human-Machine Coupled System for Efficient Sleep**

## 2 **Spindle Detection by Iterative Revision**

3 Dasheng Bi<sup>1,2,\*</sup>

4 <sup>1</sup>Hefei No.1 High School, Hefei, Anhui 230601, China

5 <sup>2</sup>McGovern Institute for Brain Research at MIT, Cambridge, MA 02139, USA

6 \*Correspondence: dashengbi2002@gmail.com

7

### 8 **Abstract**

9 Sleep spindles are characteristic events in EEG signals during non-REM sleep, and are known  
10 to be important biological markers. Manually labeling spindles by visual inspection, however,  
11 has proved to be a tedious task. Automatic detection algorithms generalize weakly for versatile  
12 spindle forms, and machine-learning methods require large datasets to train, which are  
13 unfeasible to acquire particularly for experimental animal groups. Here, a novel, integrated  
14 system based on a process of iterative “Selection-Revision” (iSR) is introduced to aid in the  
15 efficient detection of spindles. By coupling low-threshold automatic detection of spindle events  
16 based on selected parameters with manual “Revision,” the human task is effectively simplified  
17 from searching across signal traces to binary verification. Convergence was observed between  
18 resulting spindle sets through iSR, largely independent of their initial labeling, demonstrating  
19 the robustness of the method. Although possible breakdown of the revised spindle sets could  
20 be seen after multiple rounds of Revision, due to overfitting of the revised set to the initial  
21 human labeling, this could be compensated for by a Selection scheme tolerant to higher False-  
22 Negative rates of the machine labeling relative to the standard set. It was also found that iSR is  
23 generalizable to different datasets, and that initial human labeling could be substituted by low-  
24 threshold machine detection. Overall, this human-machine coupled approach allows for fast  
25 labeling to obtain consistent spindle sets, which can also be used to train machine-learning

26 models in the future. The principle of iSR may also be applied for many different data types to  
27 assist with other pattern detection tasks.

28

## 29 **Significance Statement**

30 Electroencephalography (EEG) recordings are widely adopted in brain research. Abnormalities  
31 in the occurrence of particular EEG waveforms, such as sleep spindles, can be used to diagnose  
32 psychiatric diseases. Traditionally, human experts have labeled EEG traces for sleep spindles,  
33 a time consuming process; automated detection algorithms, however, often yield inaccurate  
34 results. This study introduces a new method for efficient sleep spindle detection with a human-  
35 machine coupled system that can iteratively revise labeled datasets, enabling convergence  
36 towards a robust, accurate spindle labeling. This system eases large-scale sleep spindle  
37 detection, which can yield datasets for both biological analyses and for training machine-  
38 learning models. Furthermore, the underlying method of iterative revision can be used to  
39 analyze other types of patterns efficiently.

40

## 41 **Introduction**

42 Sleep spindles are 0.5-3s bursts in electroencephalography (EEG) recordings with central  
43 frequencies of 8-16 Hz and a distinctive waxing-waning pattern generated by the thalamic  
44 reticular nucleus (TRN) (Huupponen et al., 2000, 2007; Duman, 2005; Sitnikova et al., 2009).  
45 As a unique characteristic of non-rapid eye movement (non-REM) sleep in mammals, sleep  
46 spindles have been used as important biological markers in sleep research and for investigating  
47 the functional role of the TRN in memory consolidation and synaptic plasticity (Diekelmann  
48 and Born, 2010; Fogel and Smith, 2011). Furthermore, abnormalities in the density of sleep  
49 spindles has been experimentally determined to be correlated with schizophrenia, autism, and  
50 ADHD (Ferrarelli et al., 2007; Wamsley et al., 2012; Wells et al., 2016; Antony et al., 2018),

51 among other psychiatric disorders. Thus, counting spindles in EEG recordings and determining  
52 their characteristics could have valuable applications in medical diagnostics.

53 Traditionally, sleep spindles have been manually marked by human experts (Warby et al.,  
54 2014; Purcell et al., 2017). However, this task is time-consuming and is difficult for large-scale  
55 studies. In light of this, several automatic detection algorithms have been developed, primarily  
56 based on signal processing techniques such as band-pass filtering, amplitude thresholds, or a  
57 variety of transformations (Schimicek et al., 1994; Duman et al., 2009; Devuyst et al., 2011;  
58 Adamczyk et al., 2015). However, the fine-tuning of algorithm parameters against human gold  
59 standards can be a laborious and unsystematic task. Furthermore, besides the difficulty to obtain  
60 large gold standard spindle sets, labeling by human experts may not be completely reliable, as  
61 reflected by large variabilities between manually labeled sets (Warby et al., 2014).

62 More recently, machine-learning methods have also been researched in to improve the  
63 performance of automated detection algorithms (Gorur, 2002; Ventouras et al., 2005; Camilleri  
64 et al., 2014; Ventouras et al., 2014; Tan et al., 2015). However, the training process is  
65 convoluted and often requires very large sets of human expert labels, which may be unfeasible  
66 to obtain for specific groups of subjects such as genetically modified mice. Moreover, the  
67 overfitting of machine-learning models may also be a concern when applying such trained  
68 models to new subjects.

69 This study presents a new method to address these issues by introducing an iterative approach  
70 for spindle detection, integrating both human labeling and algorithmic automatic detection in a  
71 process of “Selection-Revision” that systematically adjusts algorithm parameters. Starting with  
72 a short segment of manually labeled spindles, the algorithm processes the EEG data to obtain  
73 more potential spindle events, creating a larger label set which is then reviewed by human visual  
74 inspection. The revised label set is then used to perform parameter adjustment of the algorithm  
75 for better alignment, and the machine-detection-human-inspection process can be performed  
76 iteratively. For new datasets, the Revision process can start with generalized, low-false negative  
77 machine detection, eliminating the need for initial manual labeling. This system effectively

78 reduces the human workload from a searching task to binary classification of spindles, and,  
79 aside from improving human consistency in labeling, can facilitate generation of large labeled  
80 datasets that can be used in future training of machine-learning models.

81

## 82 **Materials and Methods**

### 83 **Obtaining of EEG recordings**

84 The EEG data analyzed in this study was provided by Dr. Soonwook Choi at the Broad Institute  
85 of MIT and Harvard.

86

### 87 **Automatic spindle detection algorithm**

88 An automatic spindle detection algorithm was implemented using MATLAB (R2018a,  
89 Mathworks, Inc.) based on the Short-Time Fourier Transform (STFT) (Gorur, 2002), achieving  
90 fast machine labeling of spindles (~1 minute of running time for 6 hours of EEG recording).  
91 The EEG data was first preprocessed by smoothing and noise reduction. Previously sleep-  
92 scored non-REM segments of sleep were then transformed by STFT with a 300ms Hamming  
93 window and 250ms overlap. The power of the spindle frequency band (8-16 Hz) was calculated  
94 relative to the total power of the signal, and a double-threshold was applied on this power ratio  
95 for spindle detection. Segments 0.5-3 seconds long that crossed a lower threshold during their  
96 entire lengths and crossed an upper threshold at least once in their durations were considered  
97 spindles.

98

### 99 **Integrated interface**

100 A custom, integrated interface was also developed using MATLAB for EEG data and sleep  
101 spindle visualization, manual labeling, and revision. In the interface, EEG data were displayed

102 in customizable and scrollable lengths per screen, with the time axis labels marking 1-second  
103 increments and the vertical axis ranging from the minimum to maximum voltages recorded in  
104 the EEG data. Both preprocessed, non-REM segments and their corresponding filtered (band  
105 pass, 8-18 Hz) signals were displayed with linked time axes for reference.

106 For spindle labeling, human labelers could click on the start and end times of the spindle on  
107 the graph, and record the corresponding spindle events. Labelers were able to reference  
108 previously labeled events throughout one labeling session, and could modify their labels by  
109 deleting events or updating start/end points. Labelers could also continue with a new session  
110 by loading previously saved matrices containing the corresponding timestamps for labeled  
111 spindles. Initial labeling of a segment usually took 3-6 times the length of the EEG recording.

112 For fast spindle revision, reviewers could choose to accept, reject, or modify the start/end  
113 points for each potential spindle event shown, based on surrounding graphs of the EEG signal  
114 and the corresponding band pass filtered signal. Reviewers were blinded from the origin of the  
115 events shown (from the machine set, the human set, or both). Revision of one spindle usually  
116 took 2-3 seconds, and the time spent during revision depended largely on the size of the revision  
117 set.

118

### 119 **Performance evaluation**

120 Since an overwhelming majority of the EEG recording does not correspond to any spindle  
121 events, a by-sample performance analysis would yield an extremely large TN, causing inflation  
122 of the overall performance measurements. Thus, for the purposes of this study, a by-event  
123 performance evaluation was adopted, categorizing each spindle event marked by either side  
124 being evaluated as one of the following: True Positive (TP), False Positive (FP), and False  
125 Negative (FN). These criteria, especially the FN rate, was used extensively when measuring the  
126 performance of various algorithm parameter pairs.

127 As not all marked spindles perfectly overlapped with each other, it was necessary to  
128 determine whether to implement a threshold for overlapping. However, it was found that, when  
129 comparing the machine labeled sets to the initial human labeled sets, nearly all spindle events  
130 had sufficiently large overlapping percentages. Moreover, this overlap was found to have  
131 increased in the following rounds of revision. Therefore, it was unnecessary to implement an  
132 overlapping threshold but rather to accept an event as TP as long as there existed an overlap of  
133 sorts between the two sets.

134 When comparing two manually labeled or revised sets that did not solely consist of machine-  
135 generated labels, it was meaningless to define spindle events as FP or FN. Thus, recall and  
136 precision between the two sets were calculated, where

137 
$$\text{Recall} = \frac{TP}{|Standard Set|}, \text{ and}$$

138 
$$\text{Precision} = \frac{TP}{|Compared Set|}.$$

139 The harmonic means of recall and precision were calculated so that the F1 score would  
140 provide a measurement of the similarity of any two sets, and would remain independent of the  
141 order of the two sets.

142

### 143 **Statistical tests**

144 Statistical analyses, in the form of t-tests (one-tailed, two-tailed, or one-sample test for mean),  
145 were performed using MATLAB. The significance thresholds used were  $\alpha = 0.05$  for (\*),  $\alpha =$   
146  $0.01$  for (\*\*), and  $\alpha = 0.001$  for (\*\*\*). Averages are plotted as mean  $\pm$  standard deviation.  
147 See **Table 1** for a summary of the statistical analyses used.

148

### 149 **Code Accessibility**

150 The custom code described in the paper for automatic spindle detection, performance analysis,  
151 labeling, and Selection-Revision is freely available online at <https://github.com/dashengbi/siris>.  
152 For this study, the code was run on a Windows 10 computer with an Intel i5 CPU and 8.00 GB  
153 RAM.

154

## 155 **Results**

### 156 **Integrated system for EEG analysis**

157 The EEG data obtained was passed through a systematic process of manual and machine  
158 labeling, performance evaluation, and Revision, to repeatedly add to or delete from a “standard”  
159 set of spindles (See **Figure 1**). The iterative system for spindle detection is based upon two  
160 processes: Selection and Revision. Selection is the process during which machine sets with  
161 certain parameters (that can achieve appropriate alignment of algorithm-labeled spindles with  
162 those in the standard set) are chosen, and Revision is the process during which a large spindle  
163 set (including spindles from both humans and the machine) is reviewed and its spindles  
164 accepted or rejected. Selection can be applied either following an initial generation of a manual  
165 labeled set, or following a Revision process, and this Revision-Selection sequence may be  
166 applied iteratively to adjust both algorithm parameters and the standard set in order to achieve  
167 better consistency of detection.

168

### 169 **Alignment between different human and algorithm labeled sets**

170 Upon obtaining several standard sets and machine labeled sets, the spindle events were cross-  
171 analyzed. Some sample spindle events labeled by different humans and by the automatic  
172 detector are shown in **Figure 2(a)**. It was found that although some characteristic spindles were  
173 labeled by most or all of the humans and the machine, the agreement between different detectors  
174 varied largely for other events. To evaluate the performance of the algorithm, machine-labeled

175 sets with different parameters were compared with the standard sets, and plots specifying the  
176 recall versus precision rates of the machine labeled sets relative to one standard set were drawn  
177 (See **Figure 2(b)**). The outermost curve on the Recall-Precision plots represents the intrinsic  
178 tradeoff between the two statistics that the machine algorithm embodies. The plots of the  
179 agreement between different human sets are also shown. Initially, the agreement rates between  
180 different initial sets were lower than those with the machine set with optimal performance  
181 (shown by the point on the outermost curve furthest from the origin). After multiple rounds of  
182 revision coupled with their respectively selected machine sets, the agreement between revised  
183 sets from different initial sets increased greatly to points higher than those of the optimal  
184 algorithm sets.

185

#### 186 **Selection of machine labeled set for Revision**

187 To select an appropriate machine set for Revision, both false negative (FN) and false positive  
188 (FP) rates needed to be considered. The respective FP rates and machine label set sizes relative  
189 to various FN thresholds (so that the FN rate of the system would not exceed such a threshold)  
190 were plotted. Higher FN rates would cause the iterative Revision system to have more inherent  
191 false negatives relative to the ground truth, as the algorithm may not be able to detect certain  
192 spindle events the human marked as negative. Higher FP rates were correlated with much larger  
193 sets of spindles for humans to review, thus decreasing the efficiency of the Revision system.  
194 During revision, if the machine set with the optimal F1 score was selected, on average, the first  
195 round of Revision would have a FN rate of 0.5069—that can also be seen as approximately the  
196 rate of spindles not detected by humans that would also be neglected by the machine (See  
197 **Figure 3(a)**). Previous studies have shown that the FN rates between different human experts  
198 are around 0.25-0.3 (Warby et al., 2014); thus it would suffice to use a machine labeled set with  
199 FN rate  $<0.2$  to cover most spindles in the ground truth. The mean number of spindles in a  
200 1200s segment of non-REM sleep detected using the optimal-F1 score machine parameters was



201 53, while the mean number of spindles detected by machine algorithms while limiting their FN  
202 rate to less than 0.2 was 147 (See **Figure 3(b)**).

203

#### 204 **Significant increase in correlation between differently obtained spindle sets upon Revision**

205 It was found that iterative Revision could increase the alignment between resulting spindle sets  
206 from largely different initial human labeled sets (See **Figure 4(a)**). A measurement of the  
207 alignment between different spindle sets at a given time could be obtained by calculating the  
208 average F1 score between all possible pairs of spindle sets. A measurement of the disparity  
209 between all spindle sets could be obtained by calculating the standard deviation of the F1 score  
210 between all possible pairs of spindle sets. Using a one-tailed t-test assuming unequal variances  
211 between different revision rounds, it was found that the average cross-compared F1 score  
212 significantly increased as a result of the first round of Revision ( $P = 0.0417$ ). The average  
213 cross-compared F1 score significantly increased between the two subsequent rounds of  
214 Revision ( $P = 0.0021$ ). However, the average cross-compared F1 scores were not significantly  
215 different between the second and third rounds of Revision ( $P = 0.1970$ ). Thus, by applying  
216 iterative Revision, the agreement between spindle sets labeled by different humans could  
217 converge to one standard set.

218 As a result of the increased alignment between spindle sets, the algorithm parameter sets  
219 selected using iteratively revised sets also showed signs of convergence (See **Figure 4(b)**). In  
220 particular, the upper threshold of the algorithm showed a decreasing trend in standard deviation  
221 as Revision was applied continuously.

222

#### 223 **Overfitting of F1 score and breakdown of standard set with high-FN Selection schemes**

224 For two Selection schemes, three rounds of Revision-Selection were performed, starting with  
225 three different initial sets. The F1 scores obtained for the Revision rounds were found to be

226 significantly different (See **Figure 5(a)**), with those for the Selection scheme of choosing the  
227 optimal machine set (as measured by F1 score relative to the standard set obtained from each  
228 previous round) being higher (one-tailed t-test,  $P = 0.0019$ ). Examining the size of the revised  
229 standard sets obtained after several rounds of revision (See **Figure 5(b)**), it was found that there  
230 was a significant decrease in the revised set sizes relative to the sizes of the initial human-  
231 labeled sets (one-tailed t-test,  $P = 0.0118$ ). For the standard sets obtained by Revision after  
232 Selection with a FN threshold of  $< 0.2$ , there was not a significant deterioration of the set size  
233 (one-tailed t-test,  $P = 0.2328$ ). Therefore, Selection schemes with higher FN tend to introduce  
234 overfitting of the standard set with machine sets, and can cause revised standard sets to  
235 significantly decrease in size, deviating away from the ground truth; it is necessary to adopt a  
236 Selection scheme with low FN to utilize the Revision process fully.

237 Indeed, by iteratively applying Revision with Selection scheme of  $FN < 0.2$ , it was found that  
238 the agreement rate between revised standard sets from different initial sets steadily increased  
239 (See **Figure 6**).

240

#### 241 **Revision is generalizable to extended datasets by applying algorithms with Selected** 242 **parameters for initial labeling**

243 To test whether pure algorithm labeling could be applied to novel datasets with minimal loss of  
244 spindles, separate rounds of Revision, both on the previously mentioned dataset and a new  
245 dataset, were performed with the initial labeling being generated using the automatic detection  
246 algorithm. The parameters of the algorithm (lower threshold = 0.21, upper threshold = 0.47)  
247 were determined based on the previously obtained standard sets with manual initial labeling  
248 after three rounds of Revision so that the FN rate of the initial algorithm set would not exceed  
249 0.1. The correlation between the revised sets from initial algorithm and manual labeling were  
250 obtained (See **Figure 7(a)**).

251 It was found that Revision greatly increased the alignment between standard sets revised from  
252 initial algorithm and manual labeled sets (one-tailed t-tests:  $P < 0.001$  from Initial to Revision  
253 1 and  $P = 0.0476$  from Revision 1 to Revision 2). After two rounds of Revision, the agreement  
254 rate did not change significantly (two-tailed t-test,  $P = 0.3952$ ). Furthermore, it was found that  
255 for each round of Revision, the mean agreements between the revised sets obtained from initial  
256 algorithm labeling were not significantly different from those obtained from initial human  
257 labeling (two-tailed t-tests:  $P = 0.3358$ ,  $P = 0.4749$ ,  $P = 0.7019$ , and  $P = 0.3174$  for the  
258 initial round, and the first three rounds of Revision, respectively).

259 To further demonstrate the generalizability of the convergent nature of Revision to other  
260 datasets of EEG, three rounds of Revision (with Selection scheme of  $FN < 0.2$ ) were performed  
261 on another dataset using two different initial sets (manual labeling and machine labeling). By  
262 comparing the F1 scores between the two (See **Figure 7(b)**), it could be seen that the agreement  
263 rates increased through repeated Revision. Moreover, it was found that for each of these rounds  
264 of Revision, there was no significant difference in the F1 scores between the standard sets from  
265 two methods of initial labeling across the datasets (two-tailed t-tests:  $P = 0.0557$ ,  $P = 0.5388$ ,  
266  $P = 0.1373$ , and  $P = 0.3392$  for the four rounds, respectively). Therefore, the machine  
267 labeled initial sets, when combined with iterative Revision, are able to generate reliable  
268 standard sets. Thus, the method can generalize well to novel datasets.

269

## 270 **Discussion**

271 It was found that after a process of iterative Selection-Revision to adjust initial human labeled  
272 spindle sets with the introduction of certain machine-detected events, the agreement rates  
273 between different standard sets improved greatly. It was also found that a FN rate threshold was  
274 necessary for effective adjustment of the initial human set, as higher FN would cause  
275 deterioration of the spindle set size after several rounds of Revision.

276 The system of iterative Selection-Revision improves the quality of standard sets resulting  
277 from an initial set that need not be very carefully labeled by human experts. Though generally,  
278 the FP and FN rates of machine detection were high, once an appropriate machine set (with a  
279 controlled FN rate) was combined with a manually labeled set, spindle events that were  
280 previously undetected by humans could be noticed during revision. Furthermore, the Revision  
281 process also limits the introduction of false-positives into the system, as each spindle event is  
282 subjected to multiple rounds of scrutiny.

283 The most pressing issue that the Selection-Revision system addresses is that of time.  
284 Previously, accurate labeling of sleep spindles required laborious searching of EEG traces by  
285 human experts (Ventouras et al., 2005); with the system of Selection-Revision, an initial set  
286 without such time-consuming manual labeling may be applied and revised iteratively until the  
287 resulting standard set evolves towards the ground truth. During Revision, human validation of  
288 machine-labeled spindles is much easier to perform as compared to manual detection. For a 20-  
289 minute long segment of non-REM EEG, applying two rounds of Revision requires only around  
290 10 minutes, while estimated times for careful manual labeling spindles in such data can be as  
291 long as 2 hours (based on the author's own experience). This indicates that iterative Revision  
292 may reduce the human workload by as much as tenfold.

293 However, there are several aspects that should be taken into consideration. These include the  
294 potential bias of the human reviewer, who may be inclined to label and revise spindles with  
295 inconsistent standards, and the inherent FN/FP rate tradeoff of the Revision system, caused by  
296 the limitations of the machine detection algorithm (Ventouras et al., 2005; Tan et al., 2015).  
297 These concerns may be addressed by introducing certain "confusion" spindle events to evaluate  
298 the possibility of human bias during Revision, and by implementing more algorithms that are  
299 able to analyze different aspects of the EEG signal. By combining these algorithms that focus  
300 on distinct spindle characteristics, it would be able to provide more accurate machine-  
301 augmentations, reducing the human workload even more. Ultimately, the human-machine

302 coupled Selection-Revision system may generate large training sets at a fast speed, thus  
303 facilitating machine-learning models for large-scale spindle detection.

304 Despite convergence being observed between revised spindle sets and between selected upper  
305 threshold parameters of the algorithm, convergence of the lower threshold was not observed.  
306 This may be caused by the complex relationship between algorithm parameters and spindle sets,  
307 and that automatic detection may be more sensitive to upper thresholds than to lower thresholds.  
308 More systematic tests are needed to determine whether such a relationship exists. For practical  
309 purposes, however, two rounds of Revision is often sufficient to obtain reliable gold-standard  
310 spindle sets.

311 In conclusion, this study has introduced a novel method for efficient sleep spindle detection  
312 based on a mechanism of iterative machine-augmented human Revision. It has shown that  
313 through multiple rounds of Revision, largely different spindle sets that were initially coarsely  
314 labeled by humans could evolve and converge into standard sets more closely aligned with each  
315 other. This method of iterative Selection-Revision can be applied as a systematic means of fine-  
316 tuning automatic detection algorithm parameters with the absence of a meticulously generated  
317 gold standard, and can also be used to expedite the process of gold-standard label generation  
318 for training machine-learning models of spindle detection.

319

## 320 **Acknowledgements**

321 This study was started during a summer internship at the McGovern Institute for Brain Research  
322 at MIT. The author thanks Dr. Guoping Feng for providing the internship opportunity and  
323 scientific guidance; Dr. Zhanyan Fu for patient supervision; Dr. Soonwook Choi for teaching  
324 me about EEG and sleep spindles, and for providing EEG recordings of mice from the Broad  
325 Institute of MIT and Harvard; Xuyun Sun for helpful discussions on automatic detection  
326 algorithms; and Tina Naik for performing sleep-scoring of EEG traces. Initial sleep spindle sets  
327 used in the study were extracted from manual labels performed together with Dr. Soonwook

328 Choi and Xuyun Sun. The author would also like to thank his parents for their support,  
329 encouragement, and suggestions; and all the members of the Feng Lab at MIT for a stimulating  
330 discussion environment.

331

## 332 **References**

- 333 Adamczyk M, Genzel L, Dresler M, Steiger A, Friess E (2015) Automatic Sleep Spindle  
334 Detection and Genetic Influence Estimation Using Continuous Wavelet Transform.  
335 *Front Hum Neurosci* 9:624.
- 336 Antony JW, Piloto L, Wang M, Pacheco P, Norman KA, Paller KA (2018) Sleep Spindle  
337 Refractoriness Segregates Periods of Memory Reactivation. *Curr Biol* 28:1736-1743  
338 e4.
- 339 Camilleri TA, Camilleri KP, Fabri SG (2014) Automatic detection of spindles and K-complexes  
340 in sleep EEG using switching multiple models. *Biomedical Signal Processing and*  
341 *Control* 10:117-127.
- 342 Devuyt S, Dutoit T, Stenuit P, Kerkhofs M (2011) Automatic sleep spindles detection--  
343 overview and development of a standard proposal assessment method. *Conf Proc IEEE*  
344 *Eng Med Biol Soc* 2011:1713-1716.
- 345 Diekelmann S, Born J (2010) The memory function of sleep. *Nat Rev Neurosci* 11:114-126.
- 346 Duman F, Erdamar A, Eroglu O, Telatar Z, Yetkin S (2009) Efficient sleep spindle detection  
347 algorithm with decision tree. *Expert Systems with Applications* 36:9980-9985.
- 348 Duman F, Eroglu O, Telatar Z, Yetkin, S (2005) Automatic Sleep Spindle Detection and  
349 Localization Algorithm. *2005 13th European Signal Processing Conference*.
- 350 Ferrarelli F, Huber R, Peterson MJ, Massimini M, Murphy M, Riedner BA, Watson A, Bria P,  
351 Tononi G (2007) Reduced sleep spindle activity in schizophrenia patients. *Am J*  
352 *Psychiatry* 164:483-492.

- 353 Fogel SM, Smith CT (2011) The function of the sleep spindle: a physiological index of  
354 intelligence and a mechanism for sleep-dependent memory consolidation. *Neurosci*  
355 *Biobehav Rev* 35:1154-1165.
- 356 Gorur D, Halicil U, Aydin H, Ongun G, Ozgen F, Leblebicioglu K (2002) Sleep spindles  
357 detecton using short time fourier transform and neural networks. *Neural Networks,*  
358 *2002. IJCNN '02.*
- 359 Huupponen E, Gomez-Herrero G, Saastamoinen A, Varri A, Hasan J, Himanen SL (2007)  
360 Development and comparison of four sleep spindle detection methods. *Artif Intell Med*  
361 *40:157-170.*
- 362 Huupponen E, Varri A, Himanen SL, Hasan J, Lehtokangas M, Saarinen J (2000) Optimization  
363 of sigma amplitude threshold in sleep spindle detection. *J Sleep Res* 9:327-334.
- 364 Purcell SM, Manoach DS, Demanuele C, Cade BE, Mariani S, Cox R, Panagiotaropoulou R,  
365 Saxena R, Pan JQ, Smoller JW, Redline S, Stickgold R (2017) Characterizing sleep  
366 spindles in 11,630 individuals from the National Sleep Research Resource. *Nat*  
367 *Commun* 8:15930.
- 368 Schimicek P, Zeitlhofer J, Anderer P, Saletu B (1994) Automatic Sleep-Spindle Detection  
369 Procedure - Aspects of Reliability and Validity. *Clinical Electroencephalography*  
370 *25:26-29.*
- 371 Sitnikova E, Hramov AE, Koronovsky AA, van Luijtelaaar G (2009) Sleep spindles and spike-  
372 wave discharges in EEG: Their generic features, similarities and distinctions disclosed  
373 with Fourier transform and continuous wavelet analysis. *J Neurosci Methods* 180:304-  
374 316.
- 375 Tan D, Zhao R, Sun J, Qin W (2015) Sleep spindle detection using deep learning: A validation  
376 study based on crowdsourcing. *Conf Proc IEEE Eng Med Biol Soc* 2015:2828-2831.
- 377 Ventouras EM, Monoyiou EA, Ktonas PY, Paparrigopoulos TJ, Dikeos DG, Uzunoglu NK,  
378 Soldatos CR (2005) Sleep spindle detection using artificial neural networks trained  
379 with filtered time-domain EEG: a feasibility study. *Comput Methods Programs Biomed*  
380 *78:191-207.*

381 Ventouras EM, Panagi M, Tsekou H, Paparrigopoulos TJ, Ktonas PY (2014) Amplitude  
382 normalization applied to an artificial neural network-based automatic sleep spindle  
383 detection system. *Conf Proc IEEE Eng Med Biol Soc* 2014:3240-3243.

384 Wamsley EJ, Tucker MA, Shinn AK, Ono KE, McKinley SK, Ely AV, Goff DC, Stickgold R,  
385 Manoach DS (2012) Reduced sleep spindles and spindle coherence in schizophrenia:  
386 mechanisms of impaired memory consolidation?. *Biol Psychiatry* 71:154-161.

387 Warby SC, Wendt SL, Welinder P, Munk EG, Carrillo O, Sorensen HB, Jennum P, Peppard  
388 PE, Perona P, Mignot E (2014) Sleep-spindle detection: crowdsourcing and evaluating  
389 performance of experts, non-experts and automated methods. *Nat Methods* 11:385-392.

390 Wells MF, Wimmer RD, Schmitt LI, Feng G, Halassa MM (2016) Thalamic reticular  
391 impairment underlies attention deficit in *Ptchd1*(Y<sup>-/-</sup>) mice. *Nature* 532:58-63.

392

## 393 **Legends**

### 394 **Figure 1 | Diagram for iterative EEG analysis system.**

395  $I$  is the spindle label set generated from initial human labeling (only needed once),  $\{M\}$  is the  
396 set of all machine label sets with different parameters,  $M_i$  is the machine set with parameters  
397 obtained from Selection ( $i \in N \cup \{0\}$ ), and  $R_i$  is the revised standard set after  $i$  rounds of  
398 Revision ( $i \in N^+$ ). During each round of Revision, spindles are either accepted or rejected;  
399 thus  $R_{i+1}$  is necessarily a subset of  $R_i \cup M_i$ .

400

### 401 **Figure 2 | Recall-Precision Plots for Different Algorithm Parameters and Human Label** 402 **Sets.**

403 **(a)** Several spindles in three different initial human labeled sets and an algorithm set optimized  
404 for performance on one of the human sets are shown. **(b)** Each point on the plot corresponds to  
405 the recall and precision of one spindle set relative to the standard set from one human labeler



406 after different rounds of revision. Black points are results from machine labels with different  
407 parameters, and red/blue points refer to revised spindle sets starting with different initial spindle  
408 sets.

409

410 **Figure 3 | Tradeoff Between False Positive Rate, Time Efficiency, and FN Rate.**

411 Three different initial non-REM segments of 1200s length, labeled by different human experts,  
412 are shown in different colors. The stars represent the statistics obtained for the respective  
413 machine sets with the optimal F1 score performance. **(a)** Minimum FP value achieved by  
414 algorithm while maintaining FN rate below certain thresholds. **(b)** The number of spindles in  
415 machine labeled set for each of the corresponding FN thresholds. The number of machine-  
416 labeled spindles is directly related with the time required for Revision.

417

418 **Figure 4 | Convergence of Cross-Compared F1 Scores and Upper Threshold After**  
419 **Multiple Rounds of Revision**

420 **(a)** Scattered circles show the F1 score between all possible pairs of initial sets or revised  
421 standard sets under two different Selection schemes ( $FN < 0.2$  or Optimal F1 score). There  
422 were 3 points in the initial round and 21 points in all following rounds of Revision. Blue filled  
423 points show the average cross-compared F1 scores in a given round, and blue lines show the  
424 standard deviation of cross-compared F1 scores in that round. **(b)** Scattered triangles show the  
425 values of the “threshold” parameters of the optimal algorithm parameter sets selected with  
426 respect to the standard sets after various times of Revision.

427

428 **Figure 5 | Optimal F1 Score of Algorithm-Labeled Sets After Multiple Rounds of Revision**

429 **(a)** Points show the optimal F1 scores that the algorithm can obtain through parameter  
430 adjustment (with respect to differently obtained initial human sets or revised sets during the

431 same round of Revision). The connected circles show the trends of the average performance of  
432 the algorithm within each Selection scheme changing over time. **(b)** Points show the sizes of  
433 the initial or revised standard sets ( $I$  or  $R_i$ , where  $i \in \{1, 2, 3\}$ ). Connected circles show the  
434 trends of the average sizes of the revised standard sets under different Selection schemes.

435

#### 436 **Figure 6 | Increased Agreement between Standard Sets with Different Initial Sets**

437 Heatmap with color coding showing three different sets in their respective rounds of Revision.  
438 Each scaled grid shows the agreement (F1 score) between two spindle sets.

439

#### 440 **Figure 7 | Convergence of Revised Spindle Sets Starting with Algorithm Labeling**

441 **(a)** Points show the F1 score between a standard set revised with initial human labeling and a  
442 standard set revised with initial algorithm labeling. Blue filled points and lines show the average  
443 F1 score of the algorithm initial/revised set relative to human initial/revised sets of the same  
444 Revision round. **(b)** Points show the F1 scores between a standard set revised with initial human  
445 labeling and a standard set revised with initial algorithm labeling for a different trace, with the  
446 algorithm parameters used being the same as those in (a).

447

#### 448 **Table 1 | Summary of Statistical Analyses**

449 Table shows a summary of all statistical analyses performed in this study. Columns denoting  
450 the type of data being analyzed, the type of statistical test used in the analysis, and the  
451 resulting  $P$ -values are shown.

452 **Figures and Tables**

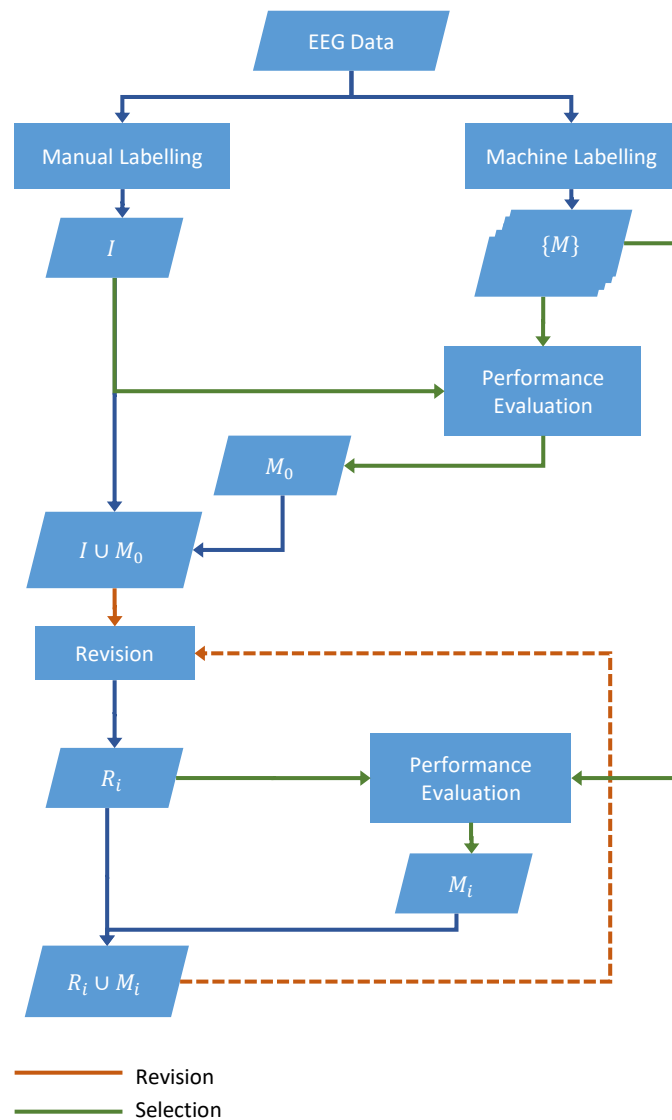

453

454 **Figure 1 | Diagram for iterative EEG analysis system.**

455  $I$  is the spindle label set generated from initial human labeling (only needed once),  $\{M\}$  is the  
 456 set of all machine label sets with different parameters,  $M_i$  is the machine set with parameters  
 457 obtained from Selection ( $i \in N \cup \{0\}$ ), and  $R_i$  is the revised standard set after  $i$  rounds of  
 458 Revision ( $i \in N^+$ ). During each round of Revision, spindles are either accepted or rejected;  
 459 thus  $R_{i+1}$  is necessarily a subset of  $R_i \cup M_i$ .

460

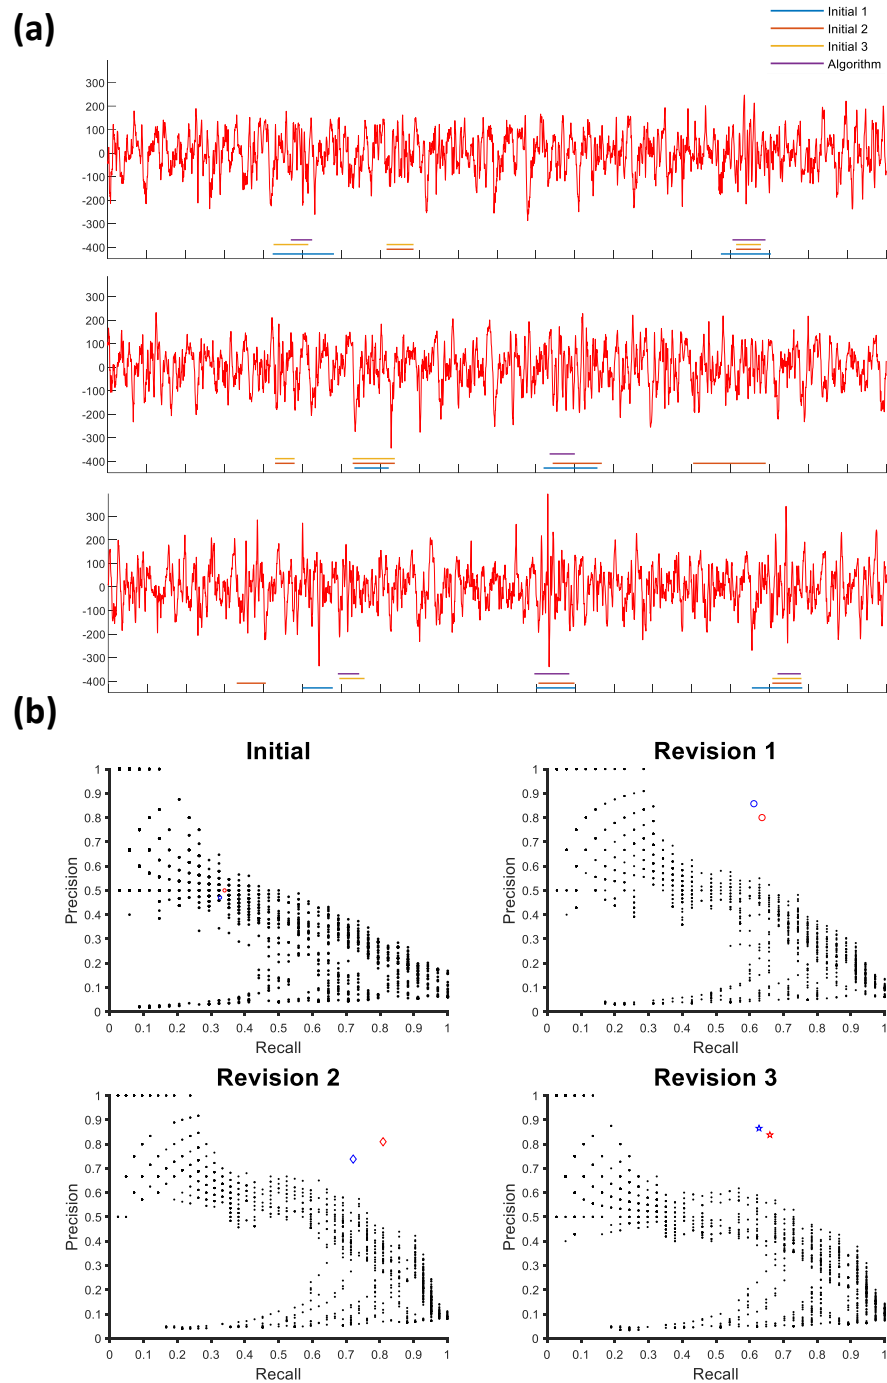

461

462 **Figure 2 | Recall-Precision Plots for Different Algorithm Parameters and Human Label**  
463 **Sets.**

464 **(a)** Several spindles in three different initial human labeled sets and an algorithm set optimized  
465 for performance on one of the human sets are shown. **(b)** Each point on the plot corresponds to  
466 the recall and precision of one spindle set relative to the standard set from one human labeler

467 after different rounds of revision. Black points are results from machine labels with different  
468 parameters, and red/blue points refer to revised spindle sets starting with different initial spindle  
469 sets.

470

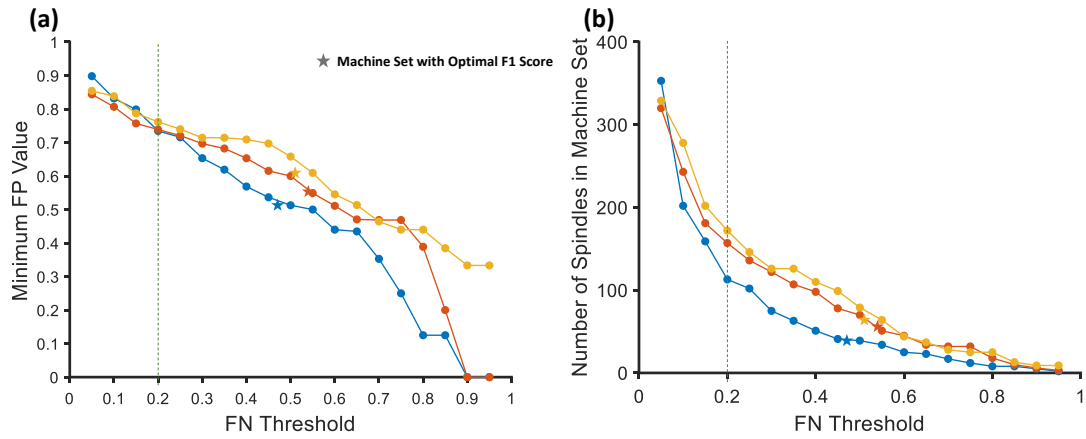

471

472 **Figure 3 | Tradeoff Between False Positive Rate, Time Efficiency, and FN Rate.**

473 Three different initial non-REM segments of 1200s length, labeled by different human experts,  
474 are shown in different colors. The stars represent the statistics obtained for the respective  
475 machine sets with the optimal F1 score performance. (a) Minimum FP value achieved by  
476 algorithm while maintaining FN rate below certain thresholds. (b) The number of spindles in  
477 machine labeled set for each of the corresponding FN thresholds. The number of machine-  
478 labeled spindles is directly related with the time required for Revision.

479

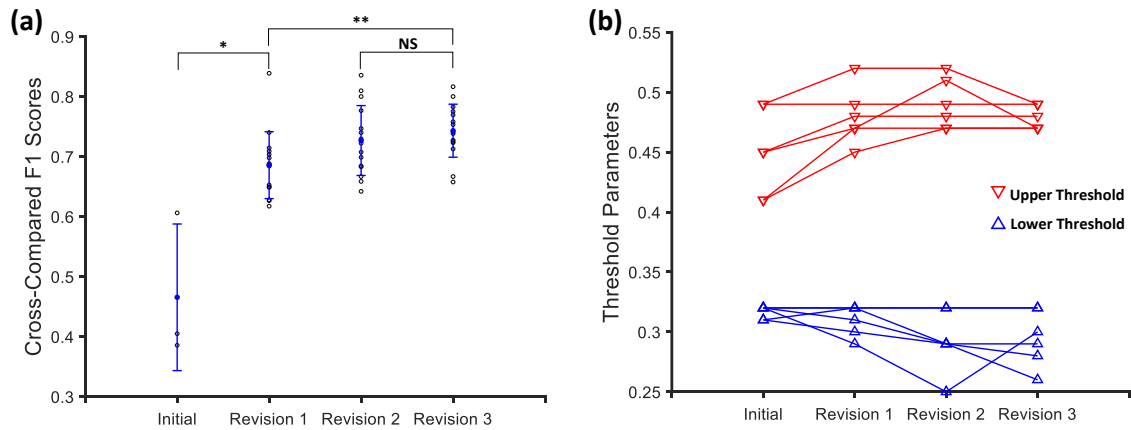

480

481 **Figure 4 | Convergence of Cross-Compared F1 Scores and Upper Threshold After**  
482 **Multiple Rounds of Revision**

483 (a) Scattered circles show the F1 score between all possible pairs of initial sets or revised  
484 standard sets under two different Selection schemes (FN < 0.2 or Optimal F1 score). There  
485 were 3 points in the initial round and 21 points in all following rounds of Revision. Blue filled  
486 points show the average cross-compared F1 scores in a given round, and blue lines show the  
487 standard deviation of cross-compared F1 scores in that round. (b) Scattered triangles show the  
488 values of the “threshold” parameters of the optimal algorithm parameter sets selected with  
489 respect to the standard sets after various times of Revision.

490

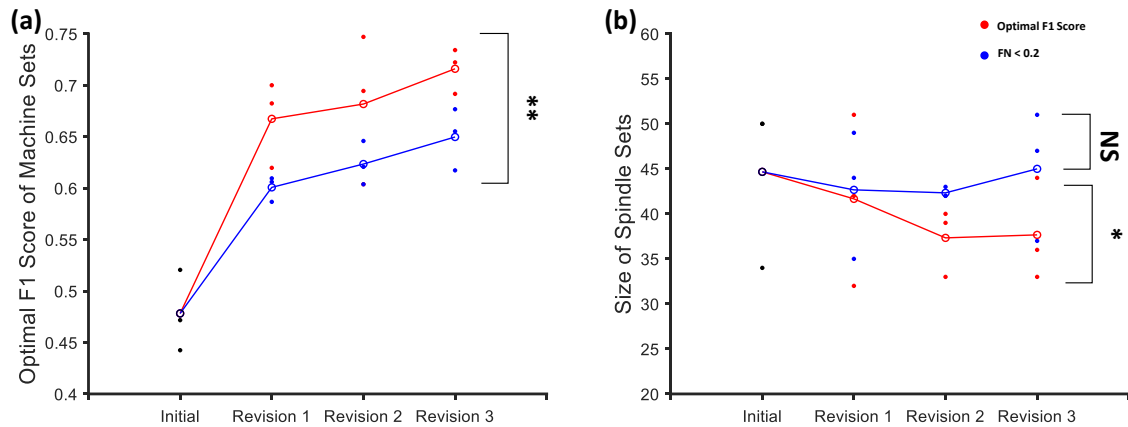

491

492 **Figure 5 | Optimal F1 Score of Algorithm-Labeled Sets After Multiple Rounds of Revision**

493 (a) Points show the optimal F1 scores that the algorithm can obtain through parameter  
494 adjustment (with respect to differently obtained initial human sets or revised sets during the  
495 same round of Revision). The connected circles show the trends of the average performance of  
496 the algorithm within each Selection scheme changing over time. (b) Points show the sizes of  
497 the initial or revised standard sets ( $I$  or  $R_i$ , where  $i \in \{1, 2, 3\}$ ). Connected circles show the  
498 trends of the average sizes of the revised standard sets under different Selection schemes.

499



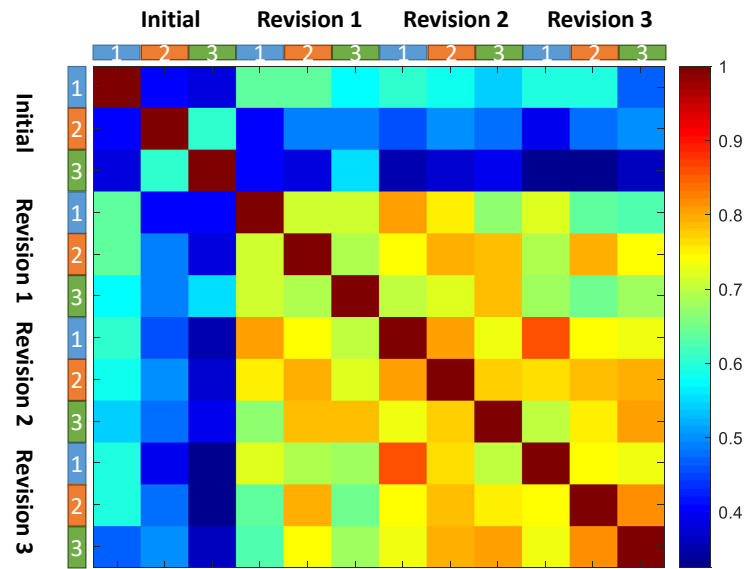

500

501 **Figure 6 | Increased Agreement between Standard Sets with Different Initial Sets**

502 Heatmap with color coding showing three different sets in their respective rounds of Revision.

503 Each scaled grid shows the agreement (F1 score) between two spindle sets.

504

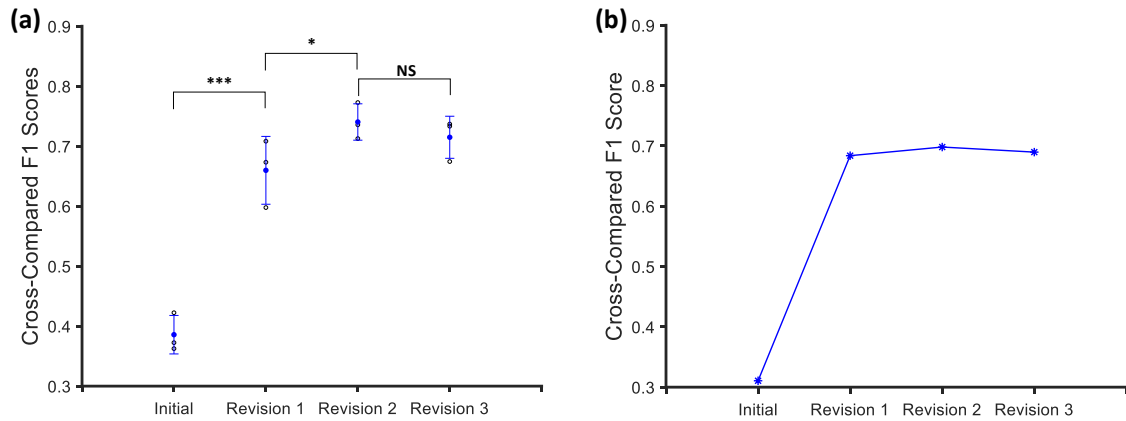

505

506 **Figure 7 | Convergence of Revised Spindle Sets Starting with Algorithm Labeling**

507 (a) Points show the F1 score between a standard set revised with initial human labeling and a  
508 standard set revised with initial algorithm labeling. Blue filled points and lines show the average  
509 F1 score of the algorithm initial/revised set relative to human initial/revised sets of the same  
510 Revision round. (b) Points show the F1 scores between a standard set revised with initial human  
511 labeling and a standard set revised with initial algorithm labeling for a different trace, with the  
512 algorithm parameters used being the same as those in (a).

513

514 **Table 1 | Summary of Statistical Analyses**

| Data Structure                                                                                                                      | Type of Test                                                                                                                     | Power                                                                        |
|-------------------------------------------------------------------------------------------------------------------------------------|----------------------------------------------------------------------------------------------------------------------------------|------------------------------------------------------------------------------|
| Correlation between spindle sets from manual initial labeling between rounds of iSR, measured by average F1 scores                  | 2-sample, one-tailed t-tests, unequal variance                                                                                   | T1: $p = 0.0417$<br>T2: $p = 0.0021$<br>T3: $p = 0.1970$                     |
| Correlation between optimal machine label set and spindle sets of the same round of iSR, measured by F1 scores                      | 2-sample, one-tailed t-test, unequal variance                                                                                    | $p = 0.0019$                                                                 |
| Size of spindle sets obtained from iSR, measured by number of events detected                                                       | 1-sample, one-tailed t-test, with $\mu_{H_0}$ = mean of initial set sizes                                                        | T1: $p = 0.0118$<br>T2: $p = 0.2328$                                         |
| Correlation between spindle sets from machine initial labeling between rounds of iSR, measured by average F1 scores                 | 2-sample, one-tailed t-tests, unequal variance;<br>2-sample, two-tailed t-test, unequal variance                                 | T1: $p < 0.001$<br>T2: $p = 0.0476$<br>T3: $p = 0.3952$                      |
| Similarity between correlations of spindle sets from manual or machine labeling in each round of iSR, measured by average F1 scores | 2-sample, two-tailed t-tests, unequal variance                                                                                   | T1: $p = 0.3358$<br>T2: $p = 0.4749$<br>T3: $p = 0.7019$<br>T4: $p = 0.3174$ |
| Similarity between correlations of spindle sets in different datasets in each round of iSR, measured by average F1 scores           | 1-sample, two-tailed t-tests, with $\mu_{H_0}$ = F1 score between spindle sets obtained from manual and machine initial labeling | T1: $p = 0.0557$<br>T2: $p = 0.5388$<br>T3: $p = 0.1373$<br>T4: $p = 0.3392$ |

515
